# Supplementary material for: Lipid nanoparticle delivery limits antisense oligonucleotide activity and cellular distribution in the brain after intracerebroventricular injection
Source: PubMed Central journal article supplement — Mol Ther Nucleic Acids. 2023 May 9;32:773–93. doi: 10.1016/j.omtn.2023.05.005 (PMC10280097; doi:10.1016/j.omtn.2023.05.005), 2023-05-09
Supplement: mmc1.pdf [file mmc1.pdf]

## **Supplemental information**

### **Lipid nanoparticle delivery limits antisense oligonucleotide activity and cellular distribution in the brain after intracerebroventricular injection**

**Amy E. Byrnes, Sara L. Dominguez, Chun-Wan Yen, Benjamin I. Laufer, Oded Foreman, Mike Reichelt, Han Lin, Meredith Sagolla, Kathy Hötzel, Hai Ngu, Christoffer Soendergaard, Alberto Estevez, Hsiu-Chao Lin, Alexandre Goyon, Juan Bian, Jessica Lin, Flora I. Hinz, Brad A. Friedman, Amy Easton, and Casper C. Hoogenraad**

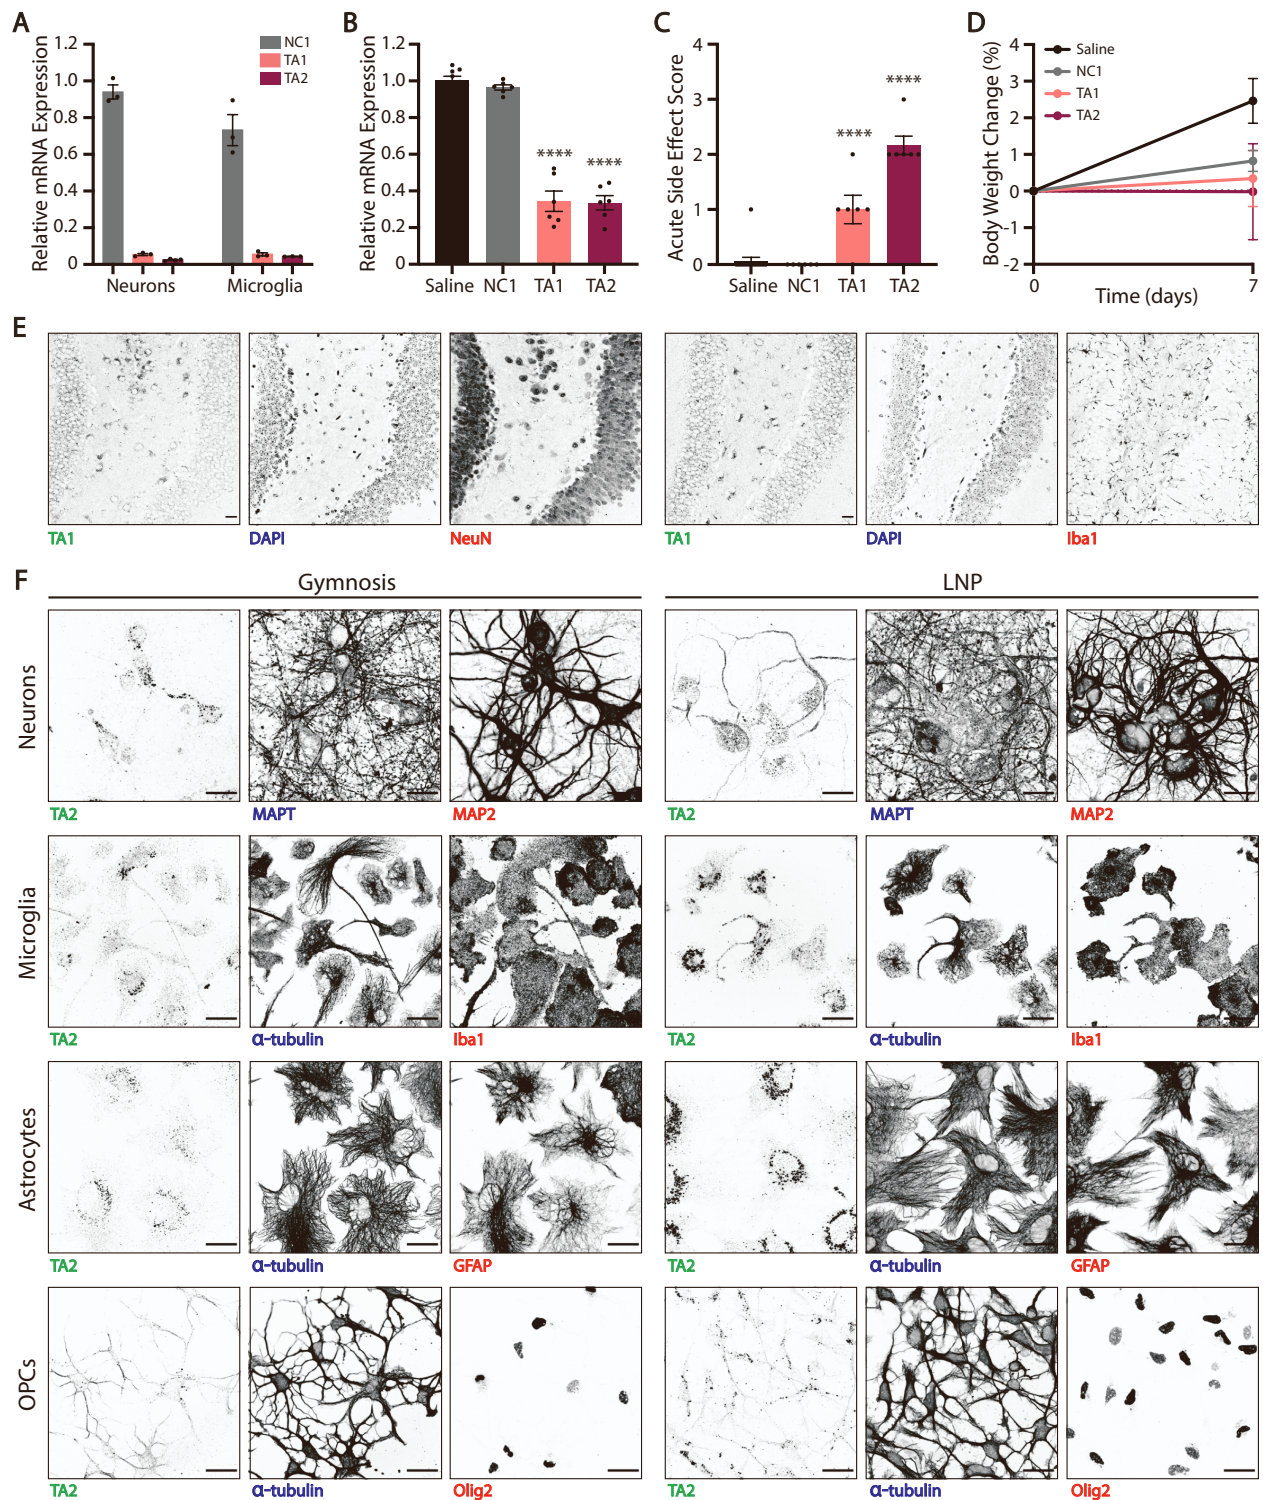

**Figure S1. TA1 and TA2 show similar efficacy and localization in cells, but TA2 is slightly toxic when ICV injected in mice. (A)** *TMEM106b* mRNA expression in cortical neurons and microglia as determined by RT-qPCR. Cells were treated with 10  $\mu$ M NC1, TA1, or TA2 for 3 days. Data were normalized to GAPDH and PBS-treated control cells. Three internal replicates were averaged and the experiments were completed in triplicate. **(B-D)** C57BL/6N mice were ICV

injected with saline ( $n = 6/\text{experiment}$ ), NC1 (100  $\mu\text{g}$ ,  $n = 6$ ), TA1 (100  $\mu\text{g}$ ,  $n = 6$ ), or TA2 (100  $\mu\text{g}$ ,  $n = 6$ ) and analyzed over 7 days. **(B)** *TMEM106b* mRNA expression levels in the brain 7 days post ICV injection as assessed by RT-qPCR. Data were normalized to GAPDH and saline-treated controls. **(C)** Acute toxicity 1 hour post injection. **(D)** Percent body weight change normalized to day 0. **(E-F)** Greyscale single channel IF images showing ASO localization in the brain and primary CNS cells. **(E)** TA1 localization in the brain shown with DAPI, and NeuN (left) or Iba1 (right) co-staining, as shown in Figure 1E, 14 days post injection. Scale bars, 100  $\mu\text{m}$ . **(F)** TA2 localization in primary CNS cells shown with cell type marker co-staining, as shown in Figure 2D (gymnosis) and 2L (LNP delivery). Cells were fixed 3 days following gymnosis or LNP delivery. Scale bars, 25  $\mu\text{m}$ . For all *in vivo* statistical analyses, one-way ANOVA with multiple comparisons Dunnett's test (saline control) was used, \*\*\*\* $p < 0.0001$ . Mean  $\pm$  SEM are shown.

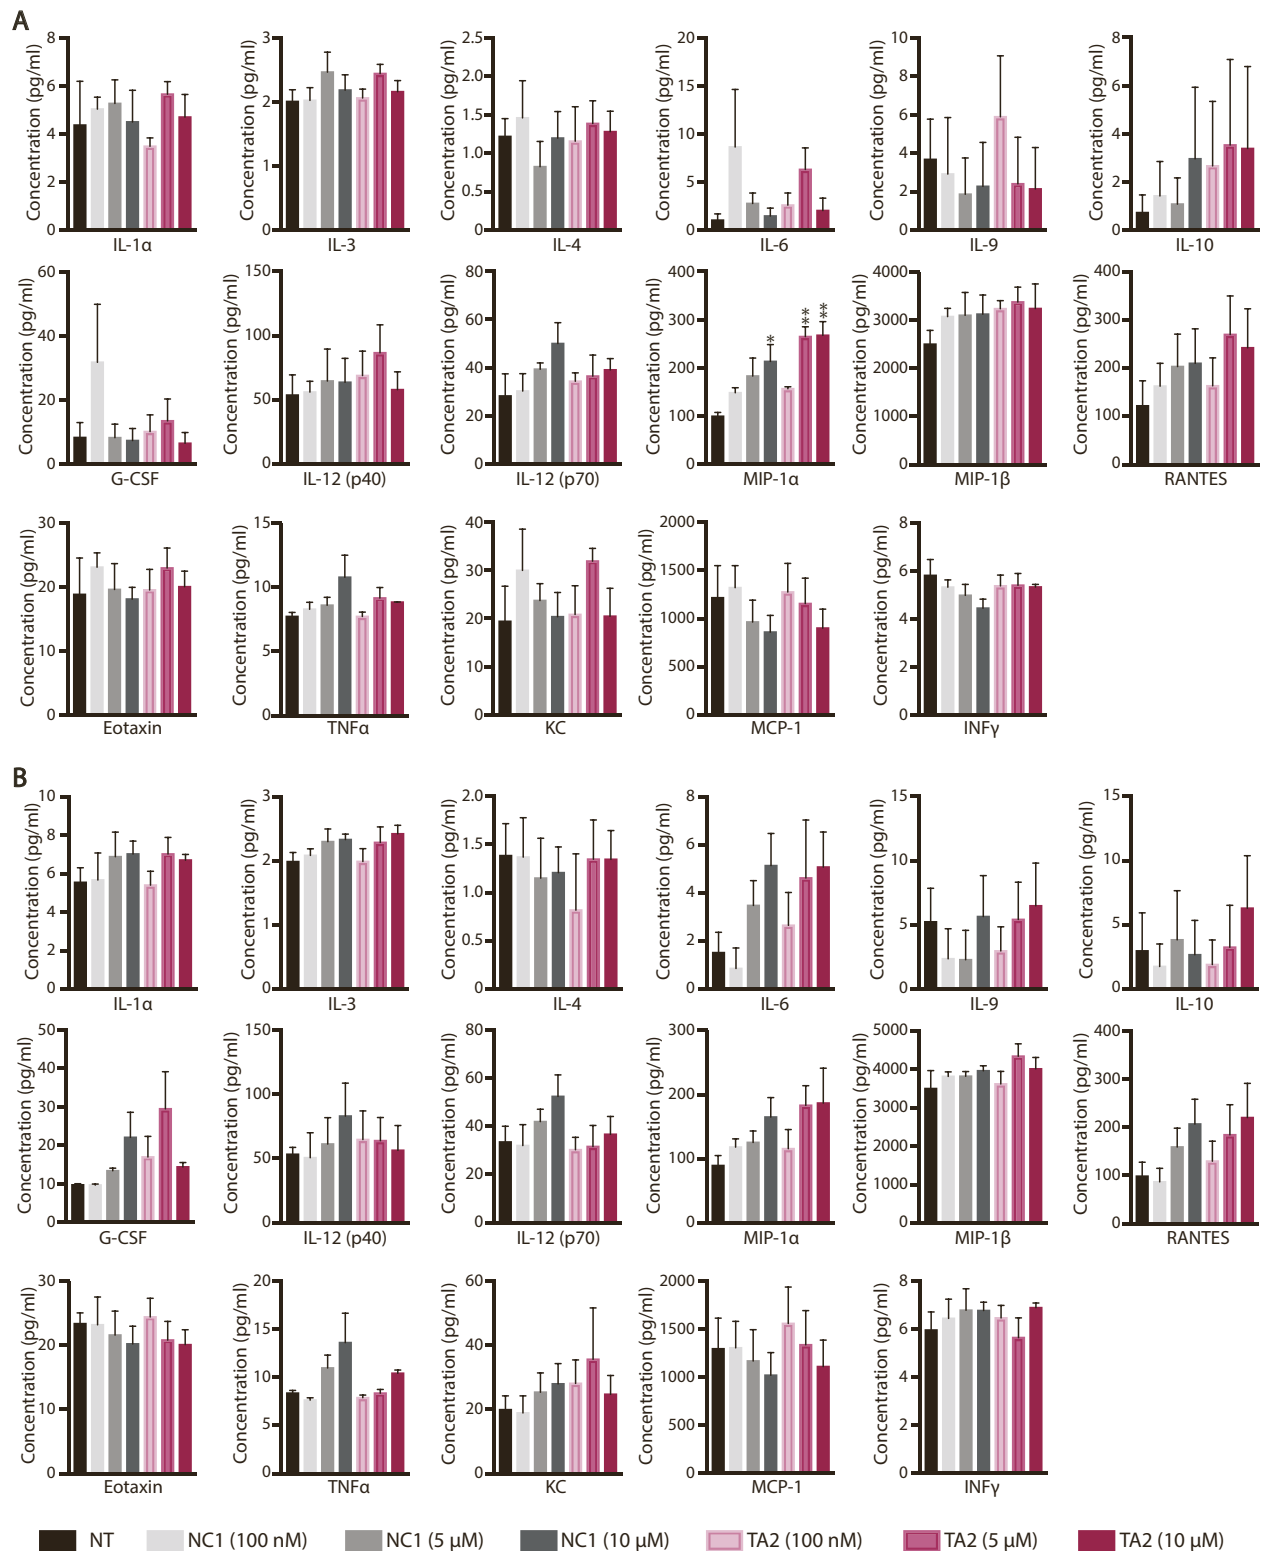

**Figure S2. ASO treatment does not induce cytokine release from microglia *in vitro*. (A-B)** Luminex multiplex analysis of cytokine release from primary microglia. Microglia were treated

with 100 nM, 5  $\mu$ M, and 10  $\mu$ M non-targeting ASO NC1 or *TMEM106b*-targeting ASO TA2, and media was collected after 1 day (**A**) or 3 days (**B**). Three internal replicates were averaged and experiments were completed in triplicate, and mean  $\pm$  SEM are shown. One-way ANOVA with multiple comparisons Dunnett's test was used (not-treated (NT) control), \* $p < 0.03$ , \*\* $p < 0.002$ .

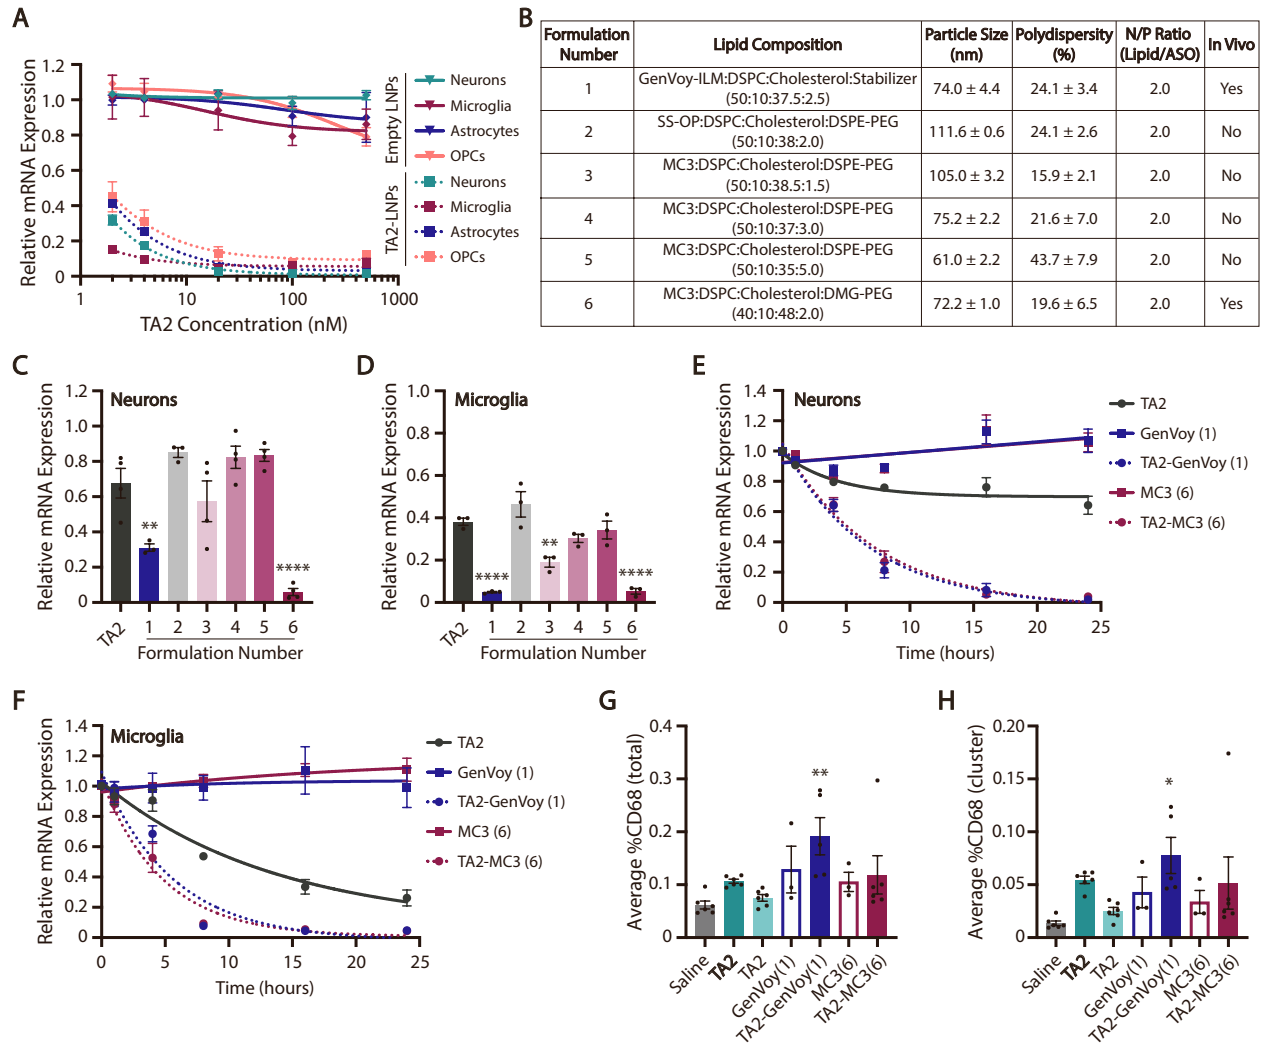

**Figure S3. ASO-LNP screening and gliosis characterization.** (A) Cells were treated with 2, 4, 20, 100, and 500 nM TA2-LNPs (dashed) or unloaded LNP controls (solid) for 3 days and *TMEM106b* mRNA expression was assessed using RT-qPCR. (B) ASO-LNP formulation characteristics including particle size and polydispersity indices. (C-D) *TMEM106b* mRNA expression in cortical neurons (C) and microglia (D) as determined by RT-qPCR. Cells were treated with 200 nM TA2 (leftmost bar) or TA2-LNP formulations (1-6) for 24 hours. (E-F) *TMEM106b* mRNA expression over time in cortical neurons (E) and microglia (F) treated with 200 nM TA2 or TA2-LNP formulations (1 and 6), as determined by RT-qPCR. (G-H) IHC analysis of total (G) and clustered (H) CD68 staining in the brain 14 days post ICV injection. For all RT-qPCR data, three internal replicates were averaged and the experiments were completed in triplicate, and data were normalized to GAPDH and PBS-treated control cells. For all panels, mean ± SEM are shown. One-way ANOVA with multiple comparisons Dunnett's test (TA2 or saline controls) was used, \* $p < 0.03$ , \*\* $p < 0.002$ , \*\*\*\* $p < 0.0001$ .

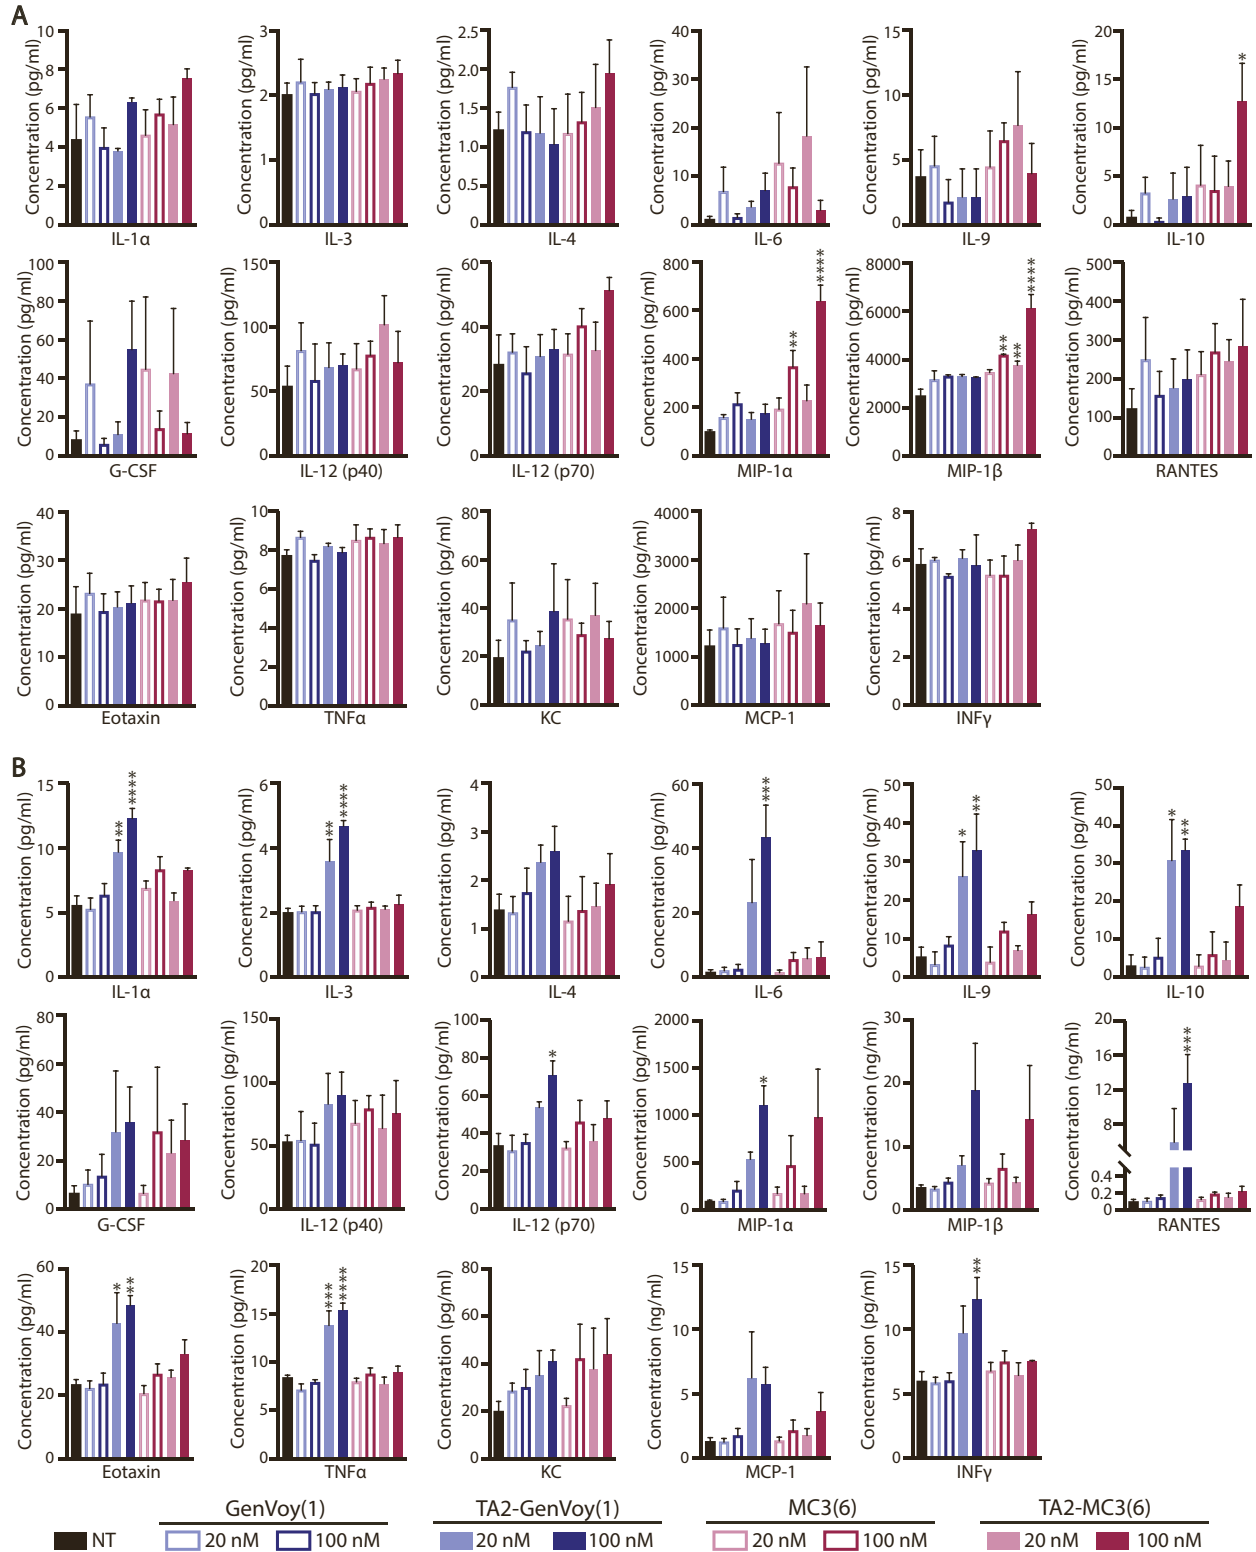

**Figure S4. ASO-LNP treatment differentially regulates cytokine release from microglia *in vitro*.** (A-B) Luminex multiplex analysis of cytokine release from primary microglia. Microglia were treated with 20 nM and 100 nM unloaded (GenVoy and MC3) or TA2-loaded (TA2-

GenVoy(1) and TA2-MC3(6) LNPs, and media was collected after 1 day (**A**) or 3 days (**B**). Three internal replicates were averaged and experiments were completed in triplicate, and mean  $\pm$  SEM are shown. One-way ANOVA with multiple comparisons Dunnett's test (NT control) was used, \* $p < 0.03$ , \*\* $p < 0.002$ , \*\*\* $p < 0.0002$ , \*\*\*\* $p < 0.0001$ .



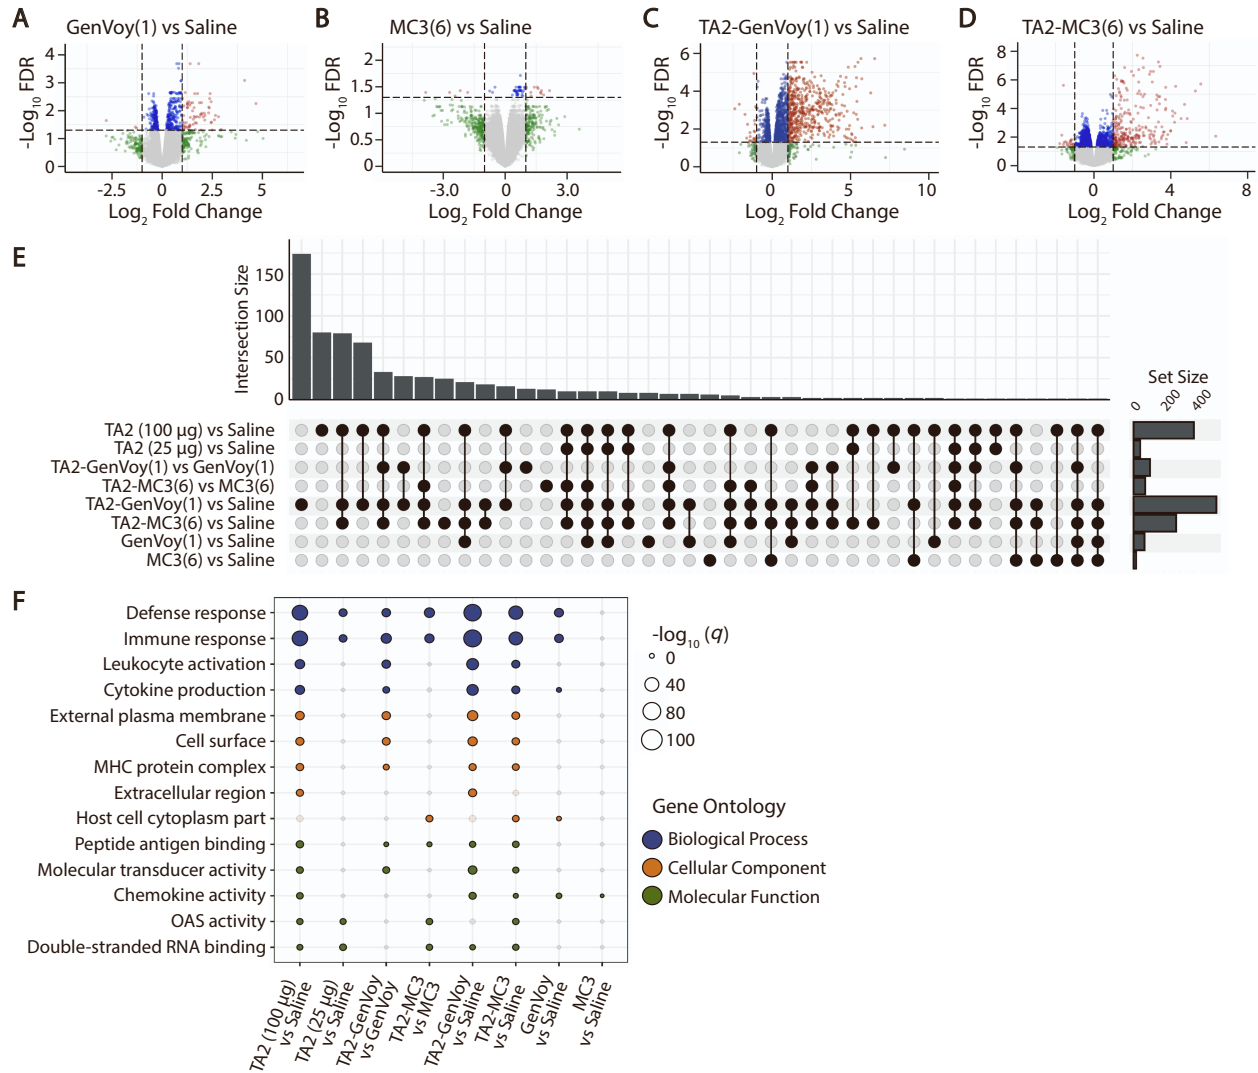

**Figure S5. TA2 and TA2-LNP transcriptomic analysis.** (A-D) Volcano plots of differential gene expression profiles from pairwise comparisons of GenVoy(1) vs Saline (A), MC3(6) vs Saline (B), TA2-GenVoy(1) vs Saline (C), and TA2-MC3(6) vs Saline (D). Red dots represent  $FDR < 0.05$  and absolute  $\log_2$  fold-change ( $\log_2FC$ )  $> 1$ , blue dots represent  $FDR < 0.05$  and absolute  $\log_2FC < 1$ , green dots represent  $FDR > 0.05$  and absolute  $\log_2FC > 1$ , and grey dots represent  $FDR > 0.05$  and absolute  $\log_2FC < 1$ . (E) UpSet plot of overlaps between significant ( $FDR < 0.05$  and absolute  $\log_2FC > 1$ ) differentially expressed genes (DEGs). (F) Gene ontology (GO) terms from analyses of significant ( $FDR < 0.05$  and absolute  $\log_2FC > 1$ ) DEGs from all pairwise comparisons. Significant ( $FWER < 0.1$ ) terms for a comparison are indicated by dots that are not transparent.

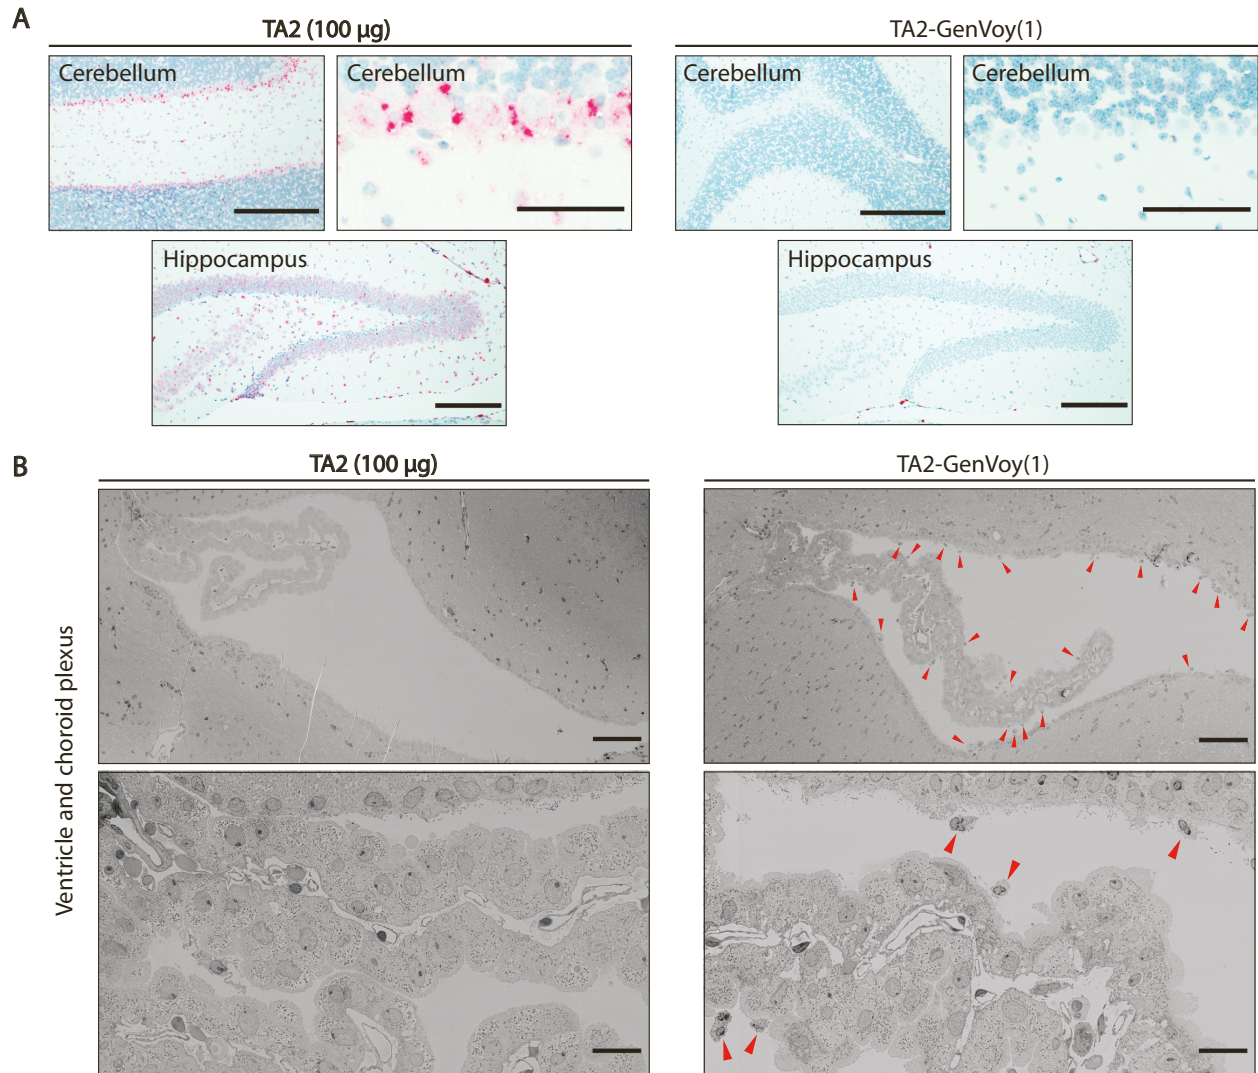

**Figure S6. Differential ASO distribution in the brain following TA2-LNP delivery.** (A) Representative anti-ASO IHC brain sections of free TA2 (100  $\mu$ g) or TA2-GenVoy(1) (25  $\mu$ g) treated animals 4 days following ICV injection, showing TA2 localization in the cerebellum and the hippocampus (red staining). Scale bars, 200  $\mu$ m (left, cerebellum and hippocampus) and 50  $\mu$ m (right, cerebellum). (B) Representative cryo-TEM images of macrophages, red arrows, lining the ventricle 4 days following TA2-GenVoy(1) administration. Scale bars, 100  $\mu$ m (top) and 20  $\mu$ m (bottom).
